# Supplementary material for: Case Article—Integrating Network Design Models for a Global Supply Network
Source: Atypon-hosted journal article supplement (doi:10.1287/ited.2019.0237ca), 2020-10-30
Supplement: ited.2019.0237ca.sm1.xlsx [file ited.2019.0237ca.sm1.xlsx]

## Sheet: Oz Sourcing
		Sea tpt	Road tpt	Product	Holding								BigM	=Sheet1!$J$6
Total cost	2.16215e+06	35100	950	2107700	18396.8								Charge_shipment	=Sheet1!$C$44:$C$49
													Con_20ft_capacity	=Sheet1!$B$60
Decision variables													Con_20ft_tpt_cost	=Sheet1!$B$37:$F$37
													Con_40ft_capacity	=Sheet1!$B$59
Total units shipped	Adelaide	Brisbane	Melbourne	Perth	Sydney	Total		BigM	500				Con_40ft_tpt_cost	=Sheet1!$B$36:$F$36
Ovis	0	900	1200	930	1300	4330			Domes location				Demand	=Sheet1!$B$33:$F$33
Adelaide	420	0	30	0	0	450	<=	500	1				Domes_capacity	=Sheet1!$I$8:$I$12
Brisbane	0	0	0	0	0	0	<=	0	0				Domes_location	=Sheet1!$J$8:$J$12
Melbourne	0	0	0	0	0	0	<=	0	0				Domes_shipout	=Sheet1!$G$8:$G$12
Perth	0	0	0	0	0	0	<=	0	0				Holding	=Sheet1!$E$2
Sydney	0	0	0	0	0	0	<=	0	0				Interest_rate	=Sheet1!$B$58
								1	1				LCL_tpt_cost	=Sheet1!$B$38:$F$38
Total units transshipped	Adelaide	Brisbane	Melbourne	Perth	Sydney								Net_inflow	=Sheet1!$B$29:$F$29
Adelaide	0	0	0	0	0	0							Num_of_20	=Sheet1!$B$24:$F$24
Brisbane	0	0	0	0	0	0							Num_of_40	=Sheet1!$B$23:$F$23
Melbourne	0	20	0	0	0	20							Num_of_LCL_units	=Sheet1!$B$25:$F$25
Perth	0	0	0	0	0	0							Ovis	=Sheet1!$B$7:$F$7
Sydney	0	10	0	0	0	10							Produced_road	=Sheet1!$B$8:$F$12
Total transfer out	0	30	0	0	0								Road_tpt_cost	=Sheet1!$B$52:$F$56
													Sea_transport	=Sheet1!$B$23:$F$25
Sea transport	Adelaide	Brisbane	Melbourne	Perth	Sydney								Total_cost	=Sheet1!$B$2
Num of 40'	0	4	6	4	6								Total_Domes_location	=Sheet1!$J$13
Num of 20'	0	1	0	1	1								Total_sea	=Sheet1!$B$26:$F$26
Num of LCL units	0	0	0	30	0								Transferred_road	=Sheet1!$B$15:$F$19
Total sea	0	900	1200	930	1300								Unit_cost	=Sheet1!$B$44:$B$49
													Units_shipped	=Sheet1!$B$7:$F$12
	Adelaide	Brisbane	Melbourne	Perth	Sydney
Net inflow	420	870	1250	930	1310
	>=	>=	>=	>=	>=
Parameters
Demand	Adelaide	Brisbane	Melbourne	Perth	Sydney
	420	870	1250	930	1310
Sea transport cost	Adelaide	Brisbane	Melbourne	Perth	Sydney
40' tpt cost	2000	1600	1800	1200	1650
20' tpt cost	1200	1000	1100	700	1050
LCL tpt cost	25	20	23	15	22
Sea lead time	Adelaide	Brisbane	Melbourne	Perth	Sydney
Ovis	30	21	28	18	25
Location	Unit cost
Ovis (Delivered)	440
Adelaide	450
Brisbane	480
Melbourne	505
Perth	490
Sydney	515
Road tpt cost	Adelaide	Brisbane	Melbourne	Perth	Sydney
Adelaide	0	35	10	35	25
Brisbane	35	0	25	70	15
Melbourne	10	25	0	45	15
Perth	35	70	45	0	55
Sydney	25	15	15	55	0
Interest rate	0.15
40' capacity	200
20' capacity	100
